# Supplementary material
Source: HighWire-hosted journal article supplement (https://thorax.bmj.com/content/79/3/236)
Supplement: inline-supplementary-material-1 [file inline-supplementary-material-1.pdf]

Koo et al., supplementary material

Supplementary material for: **Guideline concordance for timely chest imaging after new presentations of dyspnoea or haemoptysis in primary care: a retrospective cohort study**

## Appendix 1: sample derivation

In CPRD, symptom information is available in clinical files (which are typically used to capture clinical features and details during consultations), and referral files (which are typically used to capture information relating to referrals made from primary care). Symptoms recorded in both types of files were considered to identify all symptom records of interest. The symptom code lists are published as part of the following research article:

Moore SF, Price SJ, Chowienczyk S, Bostock J, Hamilton W (2021) The impact of changing risk thresholds on the number of people in England eligible for urgent investigation for possible cancer: an observational cross-sectional study. *Br J Cancer* 125:1593–7. doi:10.1038/s41416-021-01541-4

Please see the figures A1.1 and A1.2 below for sample derivation.

Koo et al., supplementary material

Figures A1.1 and A1.2: Sample derivation for dyspnoea (left) and haemoptysis (right)

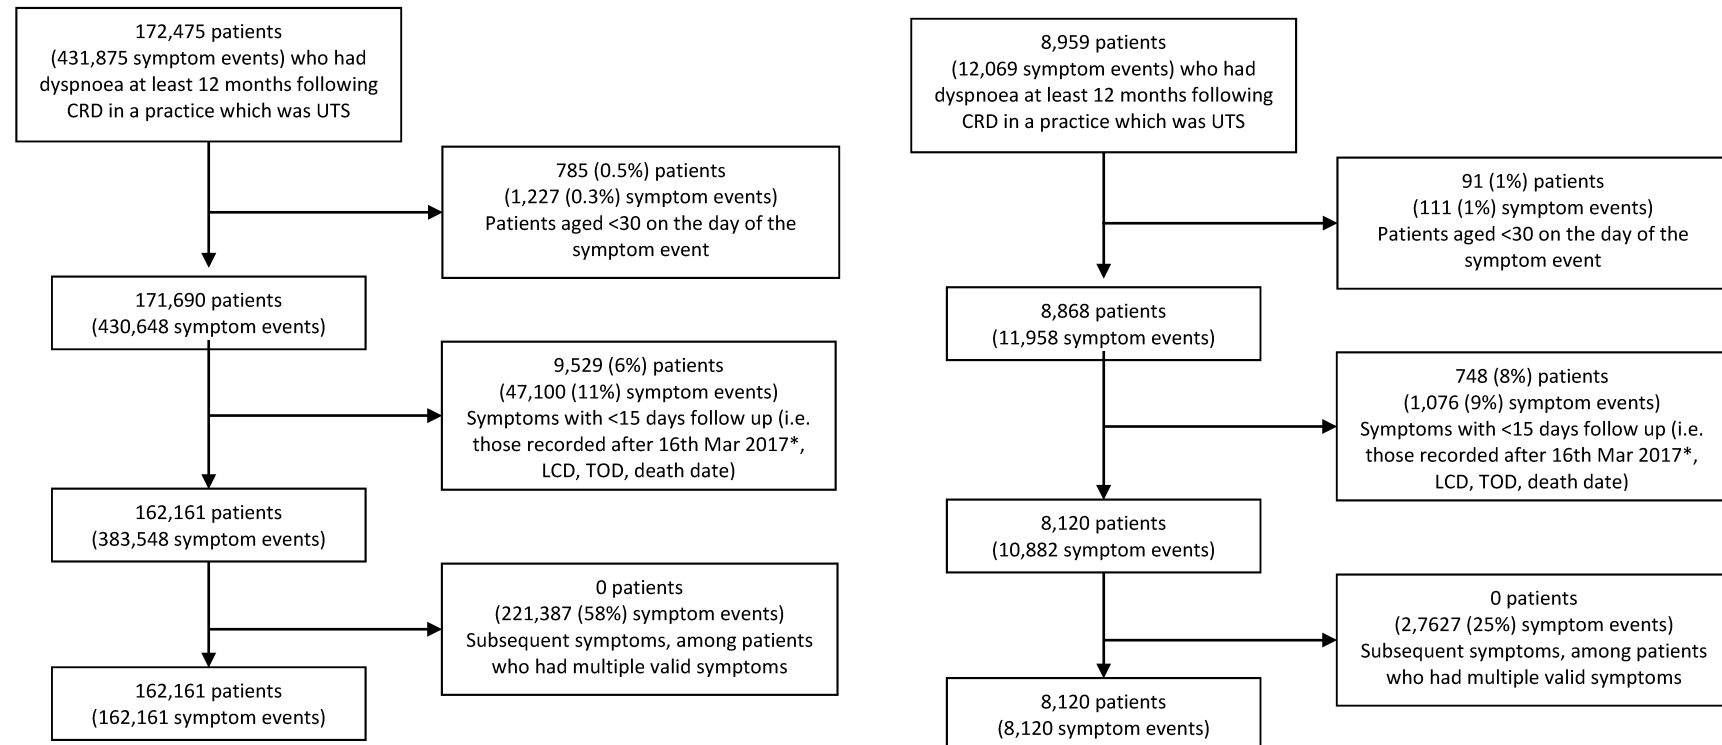

\*Symptoms recorded on or after 16 Mar 2017 were excluded as 31 March 2017 was the last reliable date in our segment of DID data, and we would be unable to confirm outcome status for these individuals

CRD: current registration date

LCD: last collection date (before a practice leaves CPRD)

TOD: transfer out date (when a patient leaves a practice)

UTS: up to standard (CPRD's practice level measure of data quality)

Koo et al., supplementary material

## Appendix 2 DID variables used to define the outcome

The three criteria (imaging modality and body region; source of referral; time from symptomatic presentation) used to define a guideline-concordant imaging event are expanded below indicating the variables used to apply the definition.

1. Tests conducted in a relevant part of the body with a relevant modality

NICIP/SNOMEDCT code lists published previously by Pearson et al 2019 were used to identify lung cancer-specific imaging. The full reference is below:

Pearson C, Fraser J, Peake M, Valori R, Poirier V, Coupland VH, Hiom S, McPhail S, Moffat J, Lyratzopoulos G, Shelton J (2019) Establishing population-based surveillance of diagnostic timeliness using linked cancer registry and administrative data for patients with colorectal and lung cancer. *Cancer Epidemiol* 61: 111–118, doi:10.1016/j.canep.2019.05.010

2. Tests that were ordered by the GP / from primary care

This was identified using two variables:

| DID variable name  | Variable description | Included value | Value description    |
|--------------------|----------------------|----------------|----------------------|
| ic_reftype_desc    | Referrer type        | 4              | GP direct access     |
| did_patsource_code | Referral source      | "GP"           | GP [string variable] |

3. Tests conducted 0-14 days from symptomatic presentation

The time from presentation to imaging was calculated using two date variables:

1. Symptom event date [from CPRD]

2. DID Diagnostic Test Date (variable name: did\_date3): the date that test took place. This variable is mandatory to complete for providers.

Koo et al., supplementary material

### Appendix 3 Imaging conducted within 4 weeks of symptomatic presentation

The main analysis was repeated with a broader definition of guideline-concordant care, namely lung imaging ordered by primary care that took place within 4 weeks of symptomatic presentation (instead of 2 weeks).

**Table A3.1 Receipt of primary care ordered chest imaging within 4 weeks of presentation among the dyspnoea cohort (n=162,161)**

| DYSPNOEA                                                        | Total  | Guideline-concordant imaging<br>N (%) | Crude OR<br>(95% CI)    | Adjusted OR<br>(95% CI)* | Adjusted OR<br>(95% CI)** |
|-----------------------------------------------------------------|--------|---------------------------------------|-------------------------|--------------------------|---------------------------|
| Total                                                           | 162161 | 26127 (16%)                           | -                       | -                        | -                         |
| Sex                                                             |        |                                       | <0.001                  | <0.001                   | <0.001                    |
| Men                                                             | 75683  | 12489 (17%)                           | Ref                     | Ref                      | Ref                       |
| Women                                                           | 86478  | 13638 (16%)                           | <b>0.95 (0.92–0.97)</b> | <b>0.94 (0.91–0.96)</b>  | <b>0.94 (0.91–0.97)</b>   |
| Age group                                                       |        |                                       | <0.001                  | <0.001                   | <0.001                    |
| 30-39 years                                                     | 9549   | 1062 (11%)                            | <b>0.65 (0.60–0.70)</b> | <b>0.55 (0.51–0.59)</b>  | <b>0.55 (0.51–0.59)</b>   |
| 40-49 years                                                     | 16602  | 2561 (15%)                            | <b>0.95 (0.90–1.00)</b> | <b>0.86 (0.82–0.91)</b>  | <b>0.87 (0.82–0.92)</b>   |
| 50-59 years                                                     | 24772  | 4000 (16%)                            | Ref                     | Ref                      | Ref                       |
| 60-69 years                                                     | 38835  | 6338 (16%)                            | 1.01 (0.97–1.06)        | <b>1.08 (1.03–1.13)</b>  | <b>1.08 (1.03–1.13)</b>   |
| 70-79 years                                                     | 40491  | 6984 (17%)                            | <b>1.08 (1.04–1.13)</b> | <b>1.11 (1.07–1.17)</b>  | <b>1.10 (1.06–1.15)</b>   |
| 80+ years                                                       | 31912  | 5182 (16%)                            | 1.01 (0.96–1.05)        | <b>0.92 (0.88–0.97)</b>  | <b>0.91 (0.87–0.96)</b>   |
| Ethnicity                                                       |        |                                       | <0.001                  | <0.001                   | <0.001                    |
| White                                                           | 143728 | 23527 (16%)                           | Ref                     | Ref                      | Ref                       |
| Non-white                                                       | 7822   | 1311 (17%)                            | 1.03 (0.97–1.09)        | 0.96 (0.90–1.02)         | 0.96 (0.90–1.02)          |
| Missing                                                         | 10611  | 1289 (12%)                            | <b>0.71 (0.67–0.75)</b> | <b>0.67 (0.63–0.71)</b>  | <b>0.67 (0.63–0.71)</b>   |
| IMD quintile                                                    |        |                                       | <0.001                  | 0.002                    | 0.002                     |
| 1 (least)                                                       | 32621  | 5756 (18%)                            | Ref                     | Ref                      | Ref                       |
| 2                                                               | 33848  | 5469 (16%)                            | <b>0.90 (0.86–0.94)</b> | <b>0.94 (0.90–0.98)</b>  | <b>0.94 (0.90–0.98)</b>   |
| 3                                                               | 33628  | 5612 (17%)                            | <b>0.93 (0.90–0.97)</b> | 0.99 (0.95–1.03)         | 0.99 (0.95–1.04)          |
| 4                                                               | 31480  | 4844 (15%)                            | <b>0.85 (0.81–0.89)</b> | <b>0.95 (0.91–0.99)</b>  | <b>0.95 (0.91–0.99)</b>   |
| 5 (most)                                                        | 30514  | 4431 (15%)                            | <b>0.79 (0.76–0.83)</b> | <b>0.94 (0.90–0.98)</b>  | <b>0.94 (0.90–0.98)</b>   |
| Smoking status                                                  |        |                                       | <0.001                  | <0.001                   | <0.001                    |
| Non-smoker                                                      | 34576  | 6653 (19%)                            | Ref                     | Ref                      | Ref                       |
| Ex-smoker                                                       | 69667  | 10961 (16%)                           | <b>0.78 (0.76–0.81)</b> | <b>0.94 (0.91–0.98)</b>  | <b>0.94 (0.91–0.97)</b>   |
| Current smoker                                                  | 57559  | 8460 (15%)                            | <b>0.72 (0.70–0.75)</b> | <b>0.89 (0.86–0.92)</b>  | <b>0.88 (0.85–0.92)</b>   |
| Missing                                                         | 359    | 53 (15%)                              | <b>0.73 (0.54–0.97)</b> | <b>0.64 (0.48–0.87)</b>  | <b>0.64 (0.47–0.86)</b>   |
| Morbidities†                                                    |        |                                       | <0.001                  | <0.001                   | <0.001                    |
| No COPD/Asthma or HF                                            | 86129  | 20123 (23%)                           | Ref                     | Ref                      | Ref                       |
| HF only                                                         | 3417   | 557 (16%)                             | <b>0.64 (0.58–0.70)</b> | <b>0.58 (0.53–0.64)</b>  | <b>0.59 (0.53–0.64)</b>   |
| COPD/Asthma only                                                | 70008  | 5262 (8%)                             | <b>0.27 (0.26–0.28)</b> | <b>0.25 (0.24–0.26)</b>  | <b>0.25 (0.24–0.26)</b>   |
| COPD/Asthma & HF                                                | 2607   | 185 (7%)                              | <b>0.25 (0.22–0.29)</b> | <b>0.22 (0.19–0.26)</b>  | <b>0.22 (0.19–0.26)</b>   |
| Imaging in the 6 weeks prior to presentation                    |        |                                       | <0.001                  | <0.001                   | <0.001                    |
| No prior imaging                                                | 153538 | 25654 (17%)                           | Ref                     | Ref                      | Ref                       |
| Prior imaging                                                   | 8623   | 473 (5%)                              | <b>0.29 (0.26–0.32)</b> | <b>0.22 (0.20–0.25)</b>  | <b>0.22 (0.20–0.24)</b>   |
| Cancer diagnosis in the year following symptomatic presentation |        |                                       | <0.001                  | <0.001                   | <0.001                    |
| No cancer                                                       | 158575 | 25297 (16%)                           | Ref                     | -                        | Ref                       |
| Lung cancer                                                     | 1103   | 291 (26%)                             | <b>1.89 (1.65–2.16)</b> | -                        | <b>2.13 (1.84–2.45)</b>   |
| Other cancer                                                    | 2483   | 539 (22%)                             | <b>1.46 (1.33–1.61)</b> | -                        | <b>1.33 (1.21–1.47)</b>   |

Joint testing p-values are presented in italics.

COPD = chronic obstructive pulmonary disease; HF = heart failure; IMD = Index of Multiple Deprivation

## Koo et al., supplementary material

\*adjusted for sex, age, ethnicity, IMD quintile, smoking status, morbidities

\*\*adjusted for sex, age, ethnicity, IMD quintile, smoking status, morbidities, cancer diagnosis

†Recorded in the 78 months to 6 months prior to symptomatic presentation

Table A3.2 Receipt of primary care ordered chest imaging within 4 weeks of presentation among the haemoptysis cohort (n=8,120)

| HAEMOPTYSIS                                                     | Total | Guideline-concordant imaging N (%) | Crude OR (95% CI)       | Adjusted OR (95% CI)*       | Adjusted OR (95% CI)**      |
|-----------------------------------------------------------------|-------|------------------------------------|-------------------------|-----------------------------|-----------------------------|
| Total                                                           | 8120  | 4234 (52%)                         |                         |                             |                             |
| Sex                                                             |       |                                    | <i>0.020</i>            | <i>0.001</i>                | <i>0.001</i>                |
| Men                                                             | 4728  | 2517 (53%)                         | Ref                     | Ref                         | Ref                         |
| Women                                                           | 3392  | 1717 (51%)                         | <b>0.90 (0.82–0.98)</b> | <b>0.86 (0.78–0.94)</b>     | <b>0.86 (0.78–0.94)</b>     |
| Age group                                                       |       |                                    | <i>&lt;0.001</i>        | <i>&lt;0.001</i>            | <i>&lt;0.001</i>            |
| 30-39 years                                                     | 904   | 389 (43%)                          | <b>0.68 (0.58–0.80)</b> | <b>0.64 (0.54–0.76)</b>     | <b>0.65 (0.55–0.77)</b>     |
| 40-49 years                                                     | 1218  | 602 (49%)                          | 0.88 (0.76–1.02)        | <b>0.85 (0.73–&lt;1.00)</b> | 0.86 (0.73–>1.00)           |
| 50-59 years                                                     | 1477  | 777 (53%)                          | Ref                     | Ref                         | Ref                         |
| 60-69 years                                                     | 1768  | 1029 (58%)                         | <b>1.25 (1.09–1.44)</b> | <b>1.31 (1.13–1.51)</b>     | <b>1.30 (1.12–1.50)</b>     |
| 70-79 years                                                     | 1646  | 901 (55%)                          | 1.09 (0.95–1.25)        | <b>1.17 (1.01–1.36)</b>     | <b>1.16 (&gt;1.00–1.35)</b> |
| 80+ years                                                       | 1107  | 536 (48%)                          | <b>0.85 (0.72–0.99)</b> | 0.89 (0.75–1.05)            | 0.87 (0.74–1.03)            |
| Ethnicity                                                       |       |                                    | <i>&lt;0.001</i>        | <i>&lt;0.001</i>            | <i>&lt;0.001</i>            |
| White                                                           | 6857  | 3622 (53%)                         | Ref                     | Ref                         | Ref                         |
| Non-white                                                       | 746   | 388 (52%)                          | 0.97 (0.83–1.13)        | 1.02 (0.86–1.20)            | 1.02 (0.87–1.20)            |
| Missing                                                         | 517   | 224 (43%)                          | <b>0.68 (0.57–0.82)</b> | <b>0.66 (0.55–0.80)</b>     | <b>0.67 (0.55–0.81)</b>     |
| IMD quintile                                                    |       |                                    | <i>0.518</i>            | <i>0.217</i>                | <i>0.248</i>                |
| 1 (least)                                                       | 1592  | 829 (52%)                          | Ref                     | Ref                         | Ref                         |
| 2                                                               | 1614  | 829 (51%)                          | 0.97 (0.85–1.12)        | 0.97 (0.84–1.12)            | 0.97 (0.84–1.12)            |
| 3                                                               | 1704  | 895 (53%)                          | 1.02 (0.89–1.17)        | 1.02 (0.88–1.17)            | 1.01 (0.88–1.17)            |
| 4                                                               | 1619  | 825 (51%)                          | 0.96 (0.83–1.10)        | 0.94 (0.81–1.08)            | 0.93 (0.81–1.08)            |
| 5 (most)                                                        | 1588  | 855 (54%)                          | 1.07 (0.93–1.23)        | 1.10 (0.95–1.28)            | 1.10 (0.95–1.27)            |
| Smoking status                                                  |       |                                    | <i>0.766</i>            | <i>0.241</i>                | <i>0.227</i>                |
| Non-smoker                                                      | 1955  | 1013 (52%)                         | Ref                     | Ref                         | Ref                         |
| Ex-smoker                                                       | 3121  | 1616 (52%)                         | 1.00 (0.89–1.12)        | 0.93 (0.82–1.05)            | 0.92 (0.82–1.05)            |
| Current smoker                                                  | 3024  | 1596 (53%)                         | 1.04 (0.93–1.16)        | 1.03 (0.91–1.16)            | 1.02 (0.91–1.16)            |
| Missing                                                         | 20    | 9 (45%)                            | 0.76 (0.31–1.84)        | 0.66 (0.27–1.63)            | 0.67 (0.27–1.64)            |
| Morbidities†                                                    |       |                                    | 0.246                   | 0.071                       | 0.071                       |
| No COPD/Asthma or HF                                            | 5596  | 2947 (53%)                         | Ref                     | Ref                         | Ref                         |
| HF only                                                         | 144   | 82 (57%)                           | 1.19 (0.85–1.66)        | 1.08 (0.76–1.53)            | 1.09 (0.77–1.54)            |
| COPD/Asthma only                                                | 2281  | 1154 (51%)                         | 0.92 (0.83–1.01)        | <b>0.88 (0.79–0.97)</b>     | <b>0.88 (0.79–0.97)</b>     |
| COPD/Asthma & HF                                                | 99    | 51 (52%)                           | 0.96 (0.64–1.42)        | 0.84 (0.56–1.27)            | 0.85 (0.56–1.28)            |
| Imaging in the 6 weeks prior to presentation                    |       |                                    | <i>0.036</i>            | <i>&lt;0.001</i>            | <i>&lt;0.001</i>            |
| No prior imaging                                                | 7567  | 4170 (55%)                         | Ref                     | Ref                         | Ref                         |
| Prior imaging                                                   | 553   | 64 (12%)                           | <b>0.11 (0.08–0.14)</b> | <b>0.10 (0.08–0.13)</b>     | <b>0.10 (0.08–0.13)</b>     |
| Cancer diagnosis in the year following symptomatic presentation |       |                                    | <i>0.065</i>            |                             | <i>0.047</i>                |
| No cancer                                                       | 7742  | 4017 (52%)                         | Ref                     |                             | Ref                         |
| Lung cancer                                                     | 253   | 150 (59%)                          | <b>1.35 (1.05–1.74)</b> |                             | <b>1.41 (1.07–1.85)</b>     |
| Other cancer                                                    | 125   | 67 (54%)                           | 1.07 (0.75–1.53)        |                             | 1.08 (0.74–1.57)            |

Joint testing p-values are presented in italics.

COPD = chronic obstructive pulmonary disease; HF = heart failure; IMD = Index of Multiple Deprivation

\*Adjusting for sex, age, ethnicity, IMD quintile, smoking status, morbidities, prior imaging

\*\*Adjusting for sex, age, ethnicity, IMD quintile, smoking status, morbidities, prior imaging, cancer diagnosis

†Recorded in the 78 months to 6 months prior to symptomatic presentation

Koo et al., supplementary material

## Appendix 4 Imaging ordered by any source

The main analysis was repeated with a broader definition of guideline-concordant care, namely lung imaging ordered by any source that was conducted within 2 weeks of symptomatic presentation (instead of looking at solely primary care ordered chest imaging).

The Diagnostic Imaging Dataset has two variables that can be used to identify who ordered the imaging (`did_patsource_code` and `ic_reftype_desc`). The variable `did_patsource_code` describes “the type of department or organisation making the referral for imaging activity” while the variable `ic_reftype_desc` describes the “referrer type description” (see Table A8.1).

There was overlap between these two variables which made it challenging to identify Inpatient vs Outpatient vs Emergency vs GP. Instead, the definition of guideline-concordant care used in the main analysis (which included a condition that `did_patsource_code=GP direct access OR ic_reftype_desc=GP`) was modified so that all timely chest imaging was included, regardless of source.

Table A4.1 DID variables used to identify source of imaging

| DID variable                    | Categories                                                                                                                                                                                                                                                                                                               |
|---------------------------------|--------------------------------------------------------------------------------------------------------------------------------------------------------------------------------------------------------------------------------------------------------------------------------------------------------------------------|
| <code>did_patsource_code</code> | 1 Admitted Patient Care – Inpatient (this healthcare provider)<br>2 admitted patient care – Day case (this healthcare provider)<br>3 Outpatient (this healthcare provider)<br>4 GP direct access<br>5 Accident & Emergency department (this healthcare provider)<br>6 Other healthcare provider<br>7 Other<br>99 Unknown |
| <code>ic_reftype_desc</code>    | GP<br>Consultant<br>Nurse<br>Physio<br>Other health professional<br>Not known                                                                                                                                                                                                                                            |

Koo et al., supplementary material

Table A4.2 Receipt of chest imaging (any source) within 2 weeks of presentation among the dyspnoea cohort (n=162,161)

| DYSPNOEA                                                        | Total  | Guideline-concordant imaging<br>N (%) | Crude OR<br>(95% CI)    | Adjusted OR<br>(95% CI)* | Adjusted OR<br>(95% CI)** |
|-----------------------------------------------------------------|--------|---------------------------------------|-------------------------|--------------------------|---------------------------|
| Total                                                           | 162161 | 34154 (21%)                           |                         |                          |                           |
| Sex                                                             |        |                                       | <i>0.001</i>            | <i>&lt;0.001</i>         | <i>&lt;0.001</i>          |
| Men                                                             | 75683  | 16214 (21%)                           | Ref                     | Ref                      | Ref                       |
| Women                                                           | 86478  | 17940 (21%)                           | <b>0.96 (0.94–0.98)</b> | <b>0.93 (0.91–0.96)</b>  | <b>0.94 (0.91–0.96)</b>   |
| Age group                                                       |        |                                       | <i>&lt;0.001</i>        | <i>&lt;0.001</i>         | <i>&lt;0.001</i>          |
| 30-39 years                                                     | 9549   | 1585 (17%)                            | <b>0.81 (0.76–0.87)</b> | <b>0.70 (0.66–0.75)</b>  | <b>0.70 (0.66–0.75)</b>   |
| 40-49 years                                                     | 16602  | 3206 (19%)                            | 0.98 (0.93–1.03)        | <b>0.90 (0.85–0.95)</b>  | <b>0.90 (0.86–0.95)</b>   |
| 50-59 years                                                     | 24772  | 4870 (20%)                            | Ref                     | Ref                      | Ref                       |
| 60-69 years                                                     | 38835  | 7705 (20%)                            | 1.01 (0.97–1.05)        | <b>1.07 (1.03–1.12)</b>  | <b>1.06 (1.02–1.11)</b>   |
| 70-79 years                                                     | 40491  | 8967 (22%)                            | 1.16 (1.12–1.21)        | <b>1.18 (1.14–1.23)</b>  | <b>1.16 (1.12–1.21)</b>   |
| 80+ years                                                       | 31912  | 7821 (25%)                            | 1.33 (1.27–1.38)        | <b>1.20 (1.15–1.25)</b>  | <b>1.18 (1.13–1.23)</b>   |
| Ethnicity                                                       |        |                                       | <i>&lt;0.001</i>        | <i>&lt;0.001</i>         | <i>&lt;0.001</i>          |
| White                                                           | 143724 | 31131 (22%)                           | Ref                     | Ref                      | Ref                       |
| Non-white                                                       | 7823   | 1714 (22%)                            | 1.01 (0.96–1.07)        | 0.95 (0.89–1.00)         | 0.95 (0.90–1.01)          |
| Missing                                                         | 10614  | 1309 (12%)                            | <b>0.51 (0.48–0.54)</b> | <b>0.49 (0.46–0.52)</b>  | <b>0.50 (0.47–0.53)</b>   |
| IMD quintile                                                    |        |                                       | <i>&lt;0.001</i>        | <i>0.001</i>             | <i>0.001</i>              |
| 1 (least)                                                       | 32621  | 7446 (23%)                            | Ref                     | Ref                      | Ref                       |
| 2                                                               | 33848  | 7184 (21%)                            | <b>0.91 (0.88–0.94)</b> | <b>0.95 (0.91–0.99)</b>  | <b>0.95 (0.91–0.99)</b>   |
| 3                                                               | 33628  | 7386 (22%)                            | <b>0.95 (0.92–0.99)</b> | 1.01 (0.97–1.05)         | 1.01 (0.97–1.05)          |
| 4                                                               | 31480  | 6319 (20%)                            | <b>0.85 (0.82–0.88)</b> | <b>0.96 (0.92–0.99)</b>  | <b>0.96 (0.92–0.99)</b>   |
| 5 (most)                                                        | 30514  | 5803 (19%)                            | <b>0.79 (0.76–0.83)</b> | <b>0.95 (0.91–0.99)</b>  | <b>0.94 (0.91–0.98)</b>   |
| Smoking status                                                  |        |                                       | <i>&lt;0.001</i>        | <i>&lt;0.001</i>         | <i>&lt;0.001</i>          |
| Non-smoker                                                      | 34576  | 8770 (25%)                            | Ref                     | Ref                      | Ref                       |
| Ex-smoker                                                       | 69667  | 14175 (20%)                           | <b>0.75 (0.73–0.77)</b> | <b>0.89 (0.86–0.92)</b>  | <b>0.88 (0.86–0.91)</b>   |
| Current smoker                                                  | 57559  | 11120 (19%)                           | <b>0.70 (0.68–0.73)</b> | <b>0.88 (0.85–0.91)</b>  | <b>0.87 (0.84–0.90)</b>   |
| Missing                                                         | 359    | 89 (25%)                              | 0.97 (0.76–1.23)        | 0.86 (0.67–1.10)         | 0.85 (0.66–1.08)          |
| Morbidities†                                                    |        |                                       | <i>&lt;0.001</i>        | <i>&lt;0.001</i>         | <i>&lt;0.001</i>          |
| No COPD/Asthma or HF                                            | 86129  | 25473 (30%)                           | Ref                     | Ref                      | Ref                       |
| HF only                                                         | 3417   | 1019 (30%)                            | 1.01 (0.94–1.09)        | <b>0.87 (0.80–0.93)</b>  | <b>0.87 (0.81–0.94)</b>   |
| COPD/Asthma only                                                | 70008  | 7305 (10%)                            | <b>0.28 (0.27–0.29)</b> | <b>0.27 (0.26–0.27)</b>  | <b>0.27 (0.26–0.27)</b>   |
| COPD/Asthma & HF                                                | 2607   | 357 (14%)                             | <b>0.38 (0.34–0.42)</b> | <b>0.33 (0.29–0.37)</b>  | <b>0.33 (0.29–0.37)</b>   |
| Imaging in the 6 weeks prior to presentation                    |        |                                       | <i>&lt;0.001</i>        | <i>&lt;0.001</i>         | <i>&lt;0.001</i>          |
| No prior imaging                                                | 153538 | 33124 (22%)                           | Ref                     | Ref                      | Ref                       |
| Prior imaging                                                   | 8623   | 1030 (12%)                            | <b>0.49 (0.46–0.53)</b> | <b>0.39 (0.37–0.42)</b>  | <b>0.39 (0.36–0.41)</b>   |
| Cancer diagnosis in the year following symptomatic presentation |        |                                       | <i>&lt;0.001</i>        | <i>&lt;0.001</i>         | <i>&lt;0.001</i>          |
| No cancer                                                       | 158575 | 32886 (21%)                           | Ref                     |                          | Ref                       |
| Lung cancer                                                     | 1103   | 453 (41%)                             | <b>2.66 (2.36–3.00)</b> |                          | <b>3.02 (2.66–3.43)</b>   |
| Other cancer                                                    | 2483   | 815 (33%)                             | <b>1.87 (1.72–2.03)</b> |                          | <b>1.68 (1.54–1.84)</b>   |

Joint testing p-values are presented in italics.

COPD = chronic obstructive pulmonary disease; HF = heart failure; IMD = Index of Multiple Deprivation

\*Adjusting for sex, age, ethnicity, IMD quintile, smoking status, morbidities, prior imaging

\*\*Adjusting for sex, age, ethnicity, IMD quintile, smoking status, morbidities, prior imaging, cancer diagnosis

†Recorded in the 78 months to 6 months prior to symptomatic presentation

Koo et al., supplementary material

Table A4.3 Receipt of chest imaging (any source) within 2 weeks of presentation among the haemoptysis cohort (n=8,120)

| HAEMOPTYSIS                                                     | Total | Guideline-concordant imaging<br>N (%) | Crude OR<br>(95% CI)    | Adjusted OR (95%<br>CI)*    | Adjusted OR (95%<br>CI)** |
|-----------------------------------------------------------------|-------|---------------------------------------|-------------------------|-----------------------------|---------------------------|
| Total                                                           | 8120  | 5039 (62%)                            |                         |                             |                           |
| Sex                                                             |       |                                       | <i>0.026</i>            | <i>0.004</i>                | <i>0.004</i>              |
| Men                                                             | 4728  | 2982 (63%)                            | Ref                     | Ref                         | Ref                       |
| Women                                                           | 3392  | 2057 (61%)                            | <b>0.90 (0.82–0.99)</b> | <b>0.87 (0.79–0.96)</b>     | <b>0.87 (0.79–0.96)</b>   |
| Age group                                                       |       |                                       | <i>&lt;0.001</i>        | <i>&lt;0.001</i>            | <i>&lt;0.001</i>          |
| 30-39 years                                                     | 904   | 463 (51%)                             | <b>0.59 (0.50–0.70)</b> | <b>0.59 (0.50–0.70)</b>     | <b>0.60 (0.50–0.71)</b>   |
| 40-49 years                                                     | 1218  | 663 (54%)                             | <b>0.67 (0.58–0.79)</b> | <b>0.66 (0.56–0.77)</b>     | <b>0.66 (0.57–0.78)</b>   |
| 50-59 years                                                     | 1477  | 944 (64%)                             | Ref                     | Ref                         | Ref                       |
| 60-69 years                                                     | 1768  | 1170 (66%)                            | 1.10 (0.96–1.28)        | 1.09 (0.94–1.27)            | 1.08 (0.93–1.25)          |
| 70-79 years                                                     | 1646  | 1096 (67%)                            | 1.13 (0.97–1.30)        | 1.12 (0.96–1.31)            | 1.10 (0.94–1.29)          |
| 80+ years                                                       | 1107  | 703 (64%)                             | 0.98 (0.84–1.16)        | 0.97 (0.82–1.15)            | 0.95 (0.80–1.12)          |
| Ethnicity                                                       |       |                                       | <i>&lt;0.001</i>        | <i>&lt;0.001</i>            | <i>&lt;0.001</i>          |
| White                                                           | 6859  | 4369 (64%)                            | Ref                     | Ref                         | Ref                       |
| Non-white                                                       | 745   | 437 (59%)                             | <b>0.81 (0.69–0.94)</b> | 0.92 (0.79–1.09)            | 0.93 (0.79–1.10)          |
| Missing                                                         | 516   | 233 (45%)                             | <b>0.47 (0.39–0.56)</b> | <b>0.50 (0.42–0.60)</b>     | <b>0.51 (0.42–0.61)</b>   |
| IMD quintile                                                    |       |                                       | <i>0.019</i>            | <i>0.004</i>                | <i>0.006</i>              |
| 1 (least)                                                       | 1592  | 984 (62%)                             | Ref                     | Ref                         | Ref                       |
| 2                                                               | 1614  | 991 (61%)                             | 0.98 (0.85–1.13)        | 0.97 (0.84–1.13)            | 0.97 (0.84–1.13)          |
| 3                                                               | 1704  | 1079 (63%)                            | 1.07 (0.93–1.23)        | 1.07 (0.93–1.24)            | 1.07 (0.92–1.23)          |
| 4                                                               | 1619  | 957 (59%)                             | 0.89 (0.78–1.03)        | 0.88 (0.76–1.02)            | 0.87 (0.75–1.01)          |
| 5 (most)                                                        | 1588  | 1026 (65%)                            | 1.13 (0.98–1.30)        | 1.16 (0.99–1.34)            | 1.14 (0.98–1.33)          |
| Smoking status                                                  |       |                                       | <i>&lt;0.001</i>        | <i>0.003</i>                | <i>0.006</i>              |
| Non-smoker                                                      | 1955  | 1130 (58%)                            | Ref                     | Ref                         | Ref                       |
| Ex-smoker                                                       | 3121  | 1991 (64%)                            | <b>1.29 (1.15–1.44)</b> | <b>1.14 (&gt;1.00–1.29)</b> | 1.12 (0.99–1.27)          |
| Current smoker                                                  | 3024  | 1909 (63%)                            | <b>1.25 (1.11–1.40)</b> | <b>1.23 (1.09–1.39)</b>     | <b>1.21 (1.07–1.37)</b>   |
| Missing                                                         | 20    | 9 (45%)                               | 0.60 (0.25–1.45)        | 0.50 (0.20–1.23)            | 0.51 (0.20–1.25)          |
| Morbidities†                                                    |       |                                       | <i>0.144</i>            | <i>0.685</i>                | <i>0.674</i>              |
| No COPD/Asthma or HF                                            | 5596  | 3439 (61%)                            | Ref                     | Ref                         | Ref                       |
| HF only                                                         | 144   | 100 (69%)                             | 1.43 (<1.00–2.04)       | 1.15 (0.80–1.66)            | 1.16 (0.80–1.68)          |
| COPD/Asthma only                                                | 2281  | 1435 (63%)                            | 1.06 (0.96–1.18)        | 0.95 (0.86–1.06)            | 0.95 (0.86–1.06)          |
| COPD/Asthma & HF                                                | 99    | 65 (66%)                              | 1.20 (0.79–1.82)        | 0.94 (0.61–1.44)            | 0.96 (0.62–1.47)          |
| Imaging in the 6 weeks prior to presentation                    |       |                                       | <i>&lt;0.001</i>        | <i>&lt;0.001</i>            | <i>&lt;0.001</i>          |
| No prior imaging                                                | 7567  | 4836 (64%)                            | Ref                     | Ref                         | Ref                       |
| Prior imaging                                                   | 553   | 203 (37%)                             | <b>0.33 (0.27–0.39)</b> | <b>0.30 (0.25–0.35)</b>     | <b>0.29 (0.24–0.35)</b>   |
| Cancer diagnosis in the year following symptomatic presentation |       |                                       | <i>&lt;0.001</i>        |                             | <i>&lt;0.001</i>          |
| No cancer                                                       | 7742  | 4757 (61%)                            | Ref                     |                             | Ref                       |
| Lung cancer                                                     | 253   | 195 (77%)                             | <b>2.11 (1.57–2.84)</b> |                             | <b>1.92 (1.41–2.60)</b>   |
| Other cancer                                                    | 125   | 87 (70%)                              | 1.44 (0.98–2.11)        |                             | 1.31 (0.88–1.95)          |

Joint testing p-values are presented in italics.

COPD = chronic obstructive pulmonary disease; HF = heart failure; IMD = Index of Multiple Deprivation

\*Adjusting for sex, age, ethnicity, IMD quintile, smoking status, morbidities, prior imaging

\*\*Adjusting for sex, age, ethnicity, IMD quintile, smoking status, morbidities, prior imaging, cancer diagnosis

†Recorded in the 78 months to 6 months prior to symptomatic presentation
